# Supplementary material for: Impact of membrane lung surface area and blood flow on extracorporeal CO2 removal during severe respiratory acidosis
Source: PubMed Central journal article supplement (PMC5539069; doi:10.1186/s40635-017-0147-0), 2017-08-01
Supplement: 40635_2017_147_MOESM1_ESM.pdf [file 40635_2017_147_MOESM1_ESM.pdf]

Supplemental Figure 1

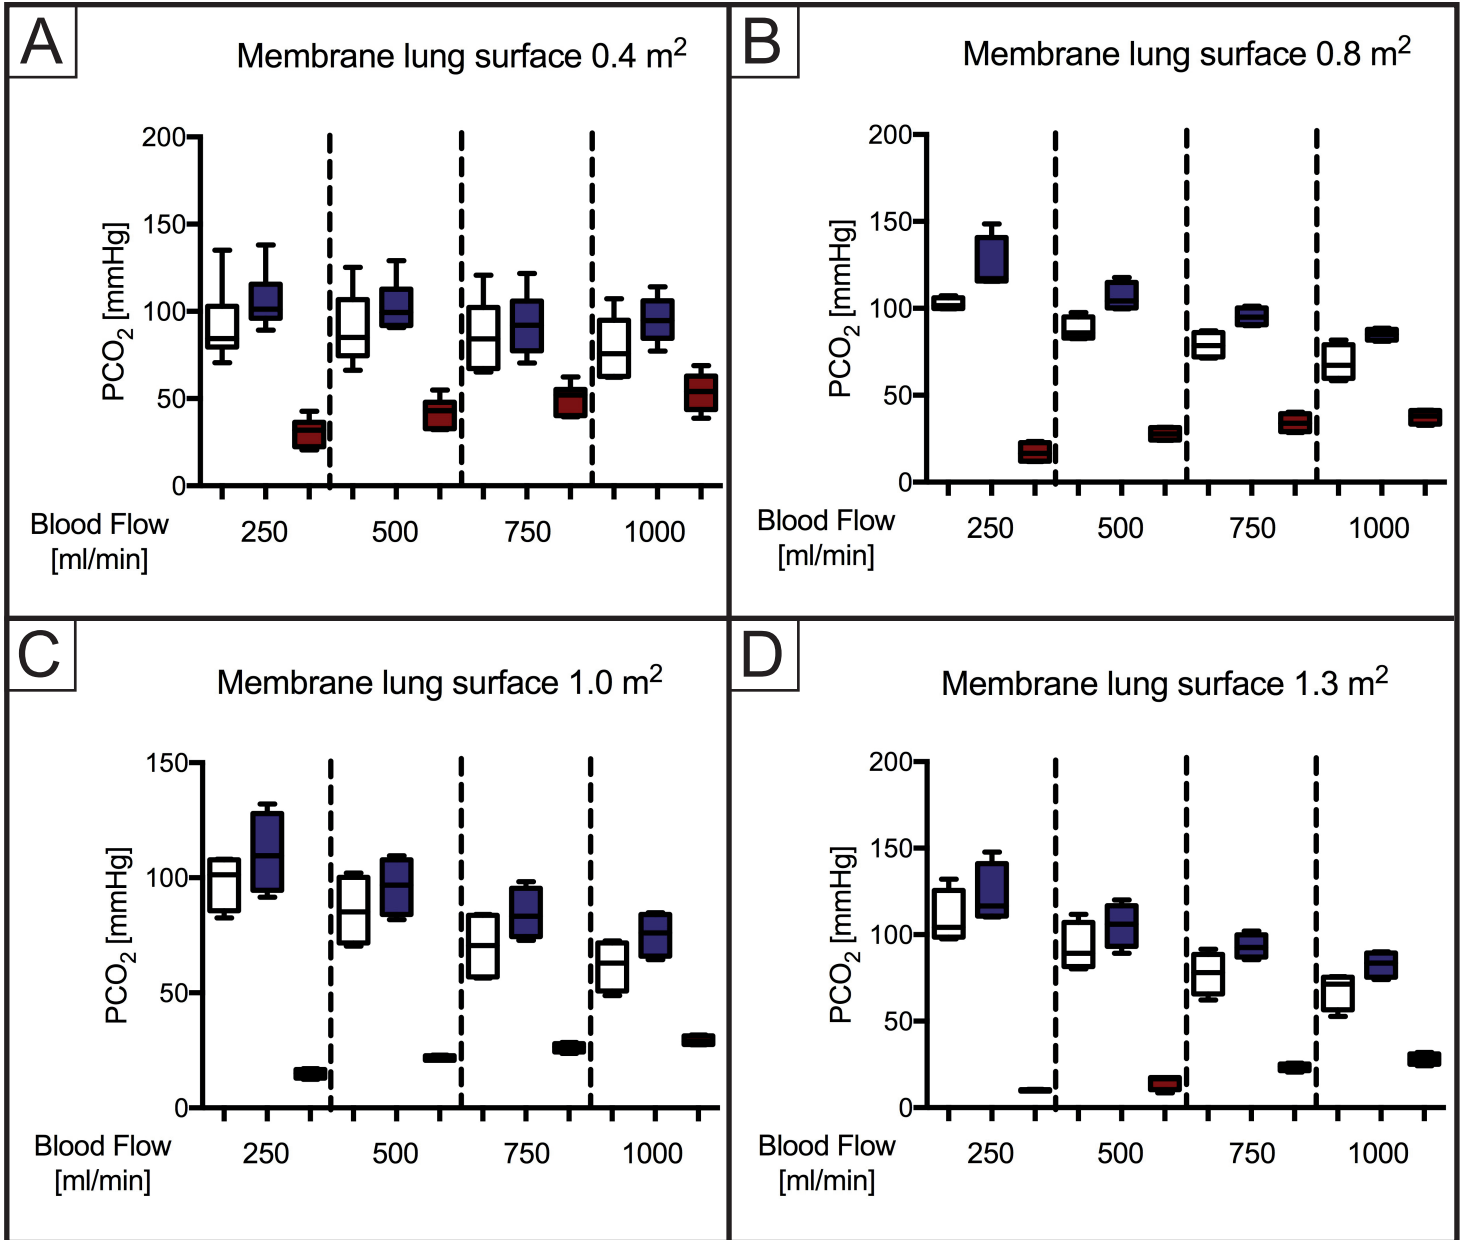

- PaCO<sub>2</sub>
- PCO<sub>2</sub> before membrane lung
- PCO<sub>2</sub> after membrane lung
